# Supplementary material for: Location-Dependent Effects of Inhibition on Local Spiking in Pyramidal Neuron Dendrites
Source: PLOS journal article supplement (doi:10.1371/journal.pcbi.1002550), 2012-06-14
Supplement: S3 (10.1371/journal.pcbi.1002550.s003) [file journal.pcbi.1002550.s003]

Figure S3, related to figures 3,4

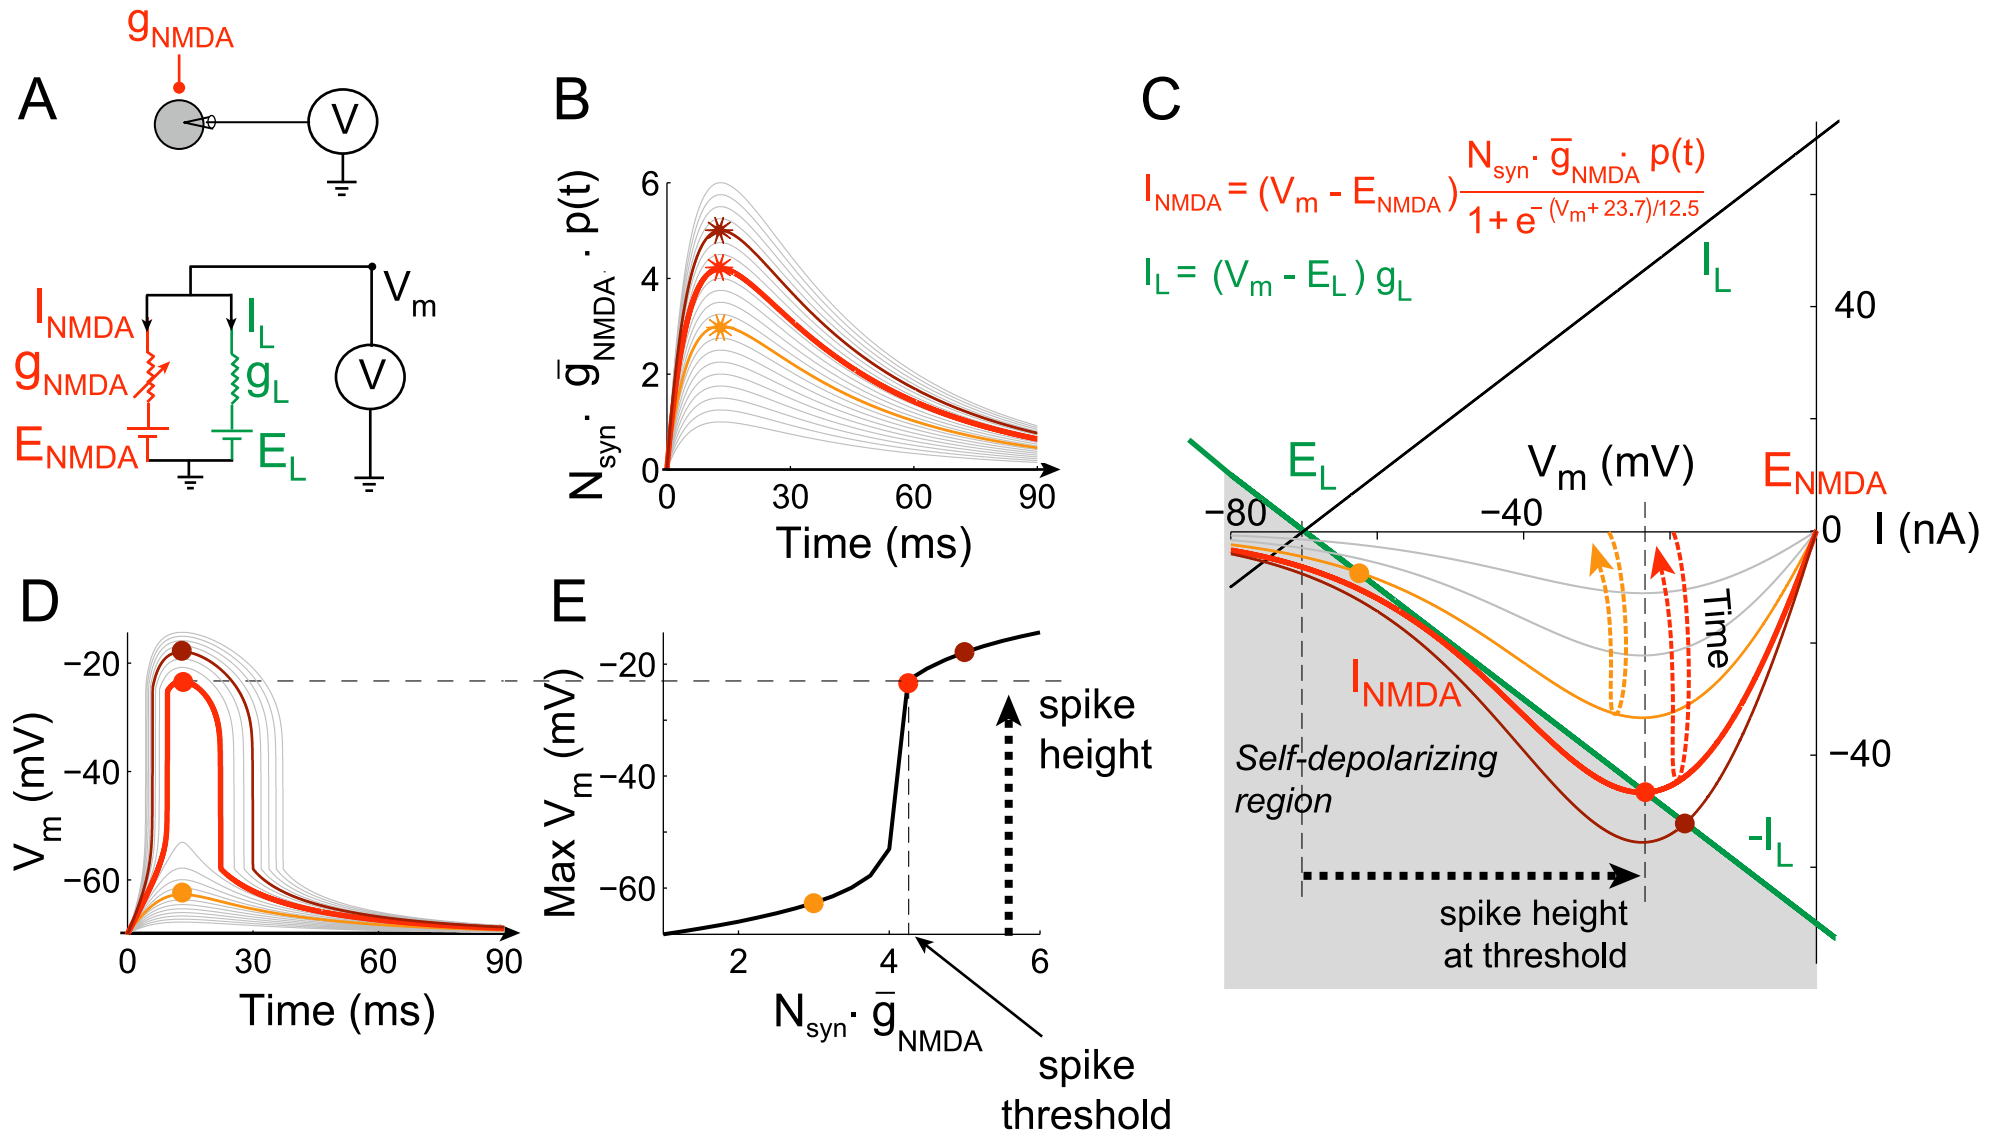

**Figure S3** Model of NMDA channel and definitions of NMDA spike threshold and height. (A) A single compartment model of neural membrane with an NMDA and leak conductance. (B) Example time courses of peak NMDA conductance for different values of  $N_{\text{syn}}$ . Asterisk indicates time at which  $p(t) = 1$ . (C) I-V curves for leak ( $I_L$ ) and steady-state (i.e.  $p(t) = 1$ ) NMDA conductance ( $I_{\text{NMDA}}$ ) in the single compartment. Mathematical formulation of NMDA conductance shows a dependence on both membrane voltage and time-dynamics [54]. Also shown are the equations for steady-state value of  $V_m$ . The I-V plots show the resulting  $V_m$  (colored dots) for the different values of  $N_{\text{syn}}$  shown in B: it is the voltage for which net inward current ( $I_{\text{NMDA}}$ ) is balanced by the outward current ( $I_L$ ). These I-V plots can also give us an idea of how the membrane voltage will change as  $p(t)$  changes in time, as shown in B. They can be thought of as instantaneous I-V curves giving an estimate for  $V_m$  (as described above) for different values of  $N_{\text{syn}} \times p(t)$ . The “Time” arrow follows the I-V curves for  $I_{\text{NMDA}}$  as  $N_{\text{syn}} \times p(t)$  changes in time. The intersection of each of these time-changing I-V curves with the leak I-V curve ( $I_L$ , reflected in green) gives an estimate for  $V_m$  as a function of time. Notice that as  $N_{\text{syn}} \times p(t)$  changes follow the yellow curve in B, the intersection of resulting I-V curves with the leak I-V curve is a linear progression similar to the linear rise and fall of  $V_m$  in D (yellow curve). When  $N_{\text{syn}} \times p(t)$  changes follow the red curve in B, the intersection of resulting I-V curves with the leak I-V curve involves a non-linear jump (yellow dot and red dot) leading to the non-linear rise and fall of  $V_m$  in D (red curve). Any value of  $N_{\text{syn}}$  larger than this will ensure a non-linear jump in the I-V domain (all curves below red) and consequently the time domain (D, all curves above red). Thus, spikes in the time domain correspond to all the NMDA I-V curves in C whose negative slope region lies completely below the  $-I_L$  (green) I-V curve, as shown. Specifically, the smallest  $N_{\text{syn}}$  (red curve) for which this is the case is a representative of the minimum conductance required, given the membrane leak, to generate a spike in time-domain. The exact  $N_{\text{syn}}$  would depend on the exact time-course of the conductance and the membrane capacitance. (D)  $V_m$  at the single compartment in the presence of time-varying NMDA conductance, as described in C. Sufficient value of  $N_{\text{syn}}$  (red) leads to a non-linear jump in peak  $V_m$  - the NMDA spike. (E). I/O curve for peak values of voltage traces shown in D. Notice the NMDA-based super-linear jump in the function.
