# Supplementary material for: Location-Dependent Effects of Inhibition on Local Spiking in Pyramidal Neuron Dendrites
Source: PLOS journal article supplement (doi:10.1371/journal.pcbi.1002550), 2012-06-14
Supplement: S5 (10.1371/journal.pcbi.1002550.s005) [file journal.pcbi.1002550.s005]

Figure S5, related to figure 3

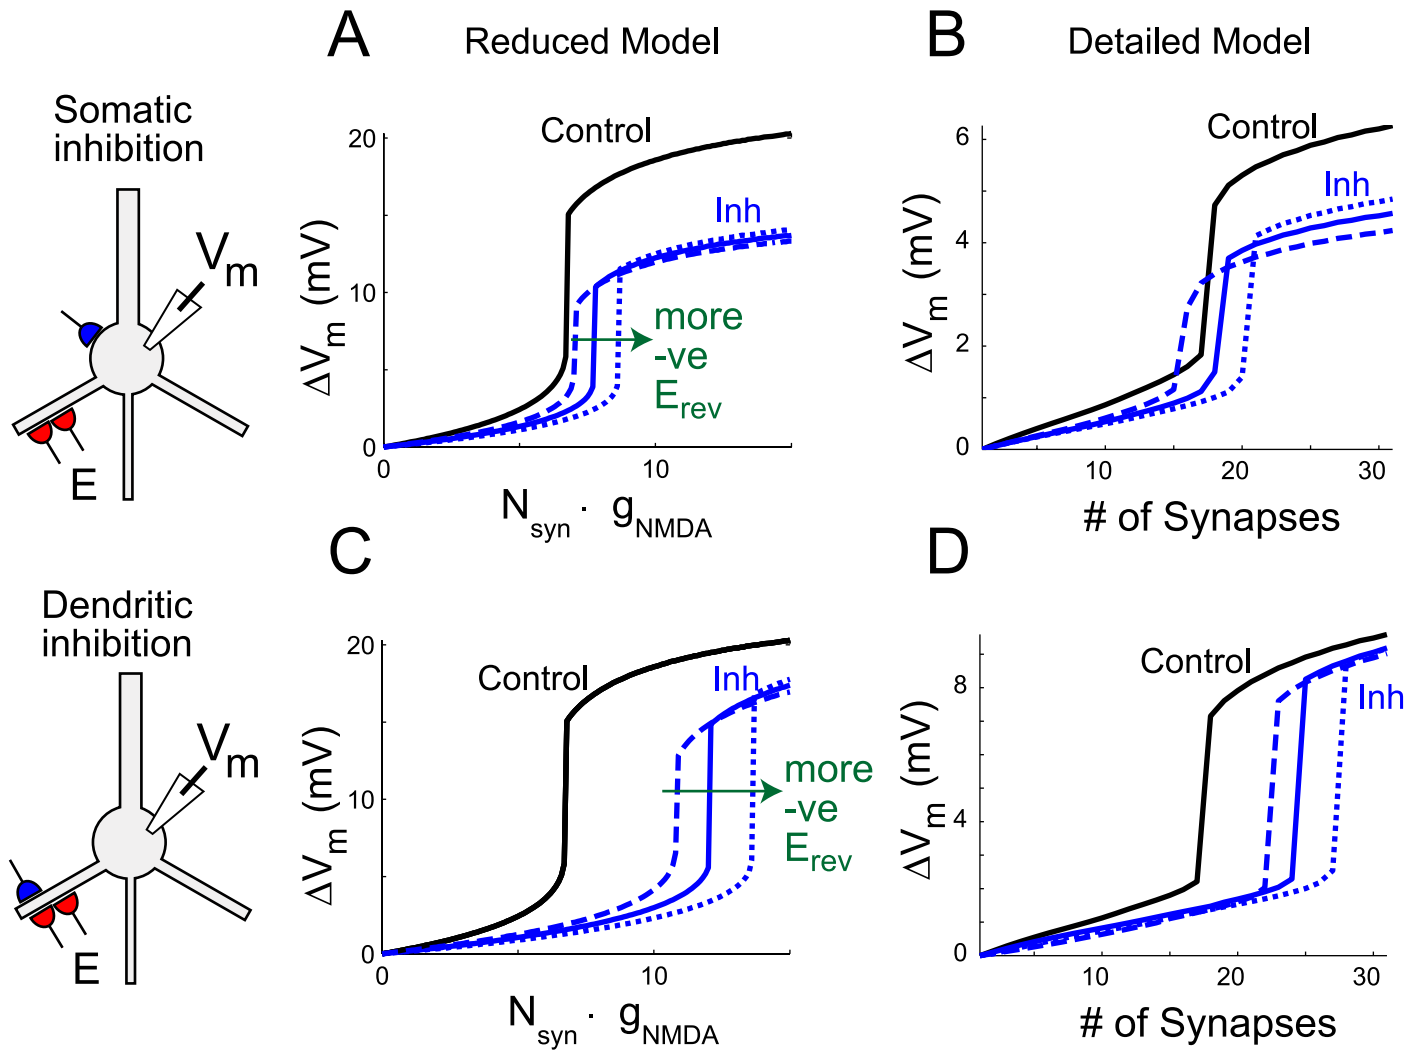

**Figure S5** Effect of reversal potential of the inhibitory conductance on the location effect. I/O curves for somatic inhibition (A,B) and dendritic inhibition (C,D) for 3 levels of inhibitory reversal potential: -60 mV (dashed), -70 mV (solid), -80 mV (dotted). The resting membrane potential was -70 mV in both the 2-compartment (A,C) and the detailed com
